# Supplementary material
Source: PubMed Central journal article supplement (PMC3657335)
Supplement: NIHMS437084-supplement-01.pdf [file NIHMS437084-supplement-01.pdf]

805

806 **Supplemental Figure 1. Protein production of CXCL1, CXCL2, and IL-8 in HVEC upon**  
807 **infection with either A909 or COH1 WT and mutant strains.** Protein expression of CXCL1  
808 (A) in HVEC supernatants 5 hours post-infection with A909,  $\Delta covR$ ,  $\Delta cylE$  or  $\Delta covR/\Delta cylE$  at  
809 MOI of 10. (B) Protein expression of IL-8, CXCL1, and CXCL2 in HVEC supernatants 6 hours  
810 post-infection with COH1 or  $\Delta covR$  at MOI of 10. Values are expressed as absorbance at 450  
811 nm. Experiments were performed at least two times with at least three replicates, and one  
812 representative experiment is shown. Data was analyzed by unpaired Student's *t* test. \*\*\*\*  
813  $p < 0.0001$ .

814

815 **Supplemental Figure 2. GBS COH1 interaction with vaginal epithelium *in vitro* and**  
816 **persistence *in vivo*.** Adherence (A) and invasion (B) of GBS COH1 and mutant strains to  
817 HVEC. Values are expressed as the total of cell-associated cfu (A) or total intracellular cfu (B)  
818 recovered compared to original inoculum. Assays were performed at an MOI of 1. (C)  
819 Approximately  $1 \times 10^7$  cfu GBS was inoculated into the vaginal lumen of 8 week old CD1 mice

820 (n = 10 per group). GBS persistence was measured by swabbing the vagina and enumerating  
821 recovered bacteria. Experiments were repeated at least 2 times in triplicate (for cell assays) and  
822 data from a representative experiment is shown. Data was analyzed by unpaired Student's *t* test  
823 for cell assays and Kruskal-Wallis test for persistence. \*  $p < 0.05$ , \*\*  $p < 0.01$ , \*\*\*  $p < 0.001$ .

824 **Supplemental Figure 3. Restoration of WT phenotypes *in vitro* following *covR***  
825 **complementation, and cell viability assays.** Adherence (A) and invasion (B) of GBS A909,  
826  $\Delta covR$ , and complemented *pcovR* strains in HVEC. Values are expressed as the total of cell-  
827 associated cfu (A) or total intracellular cfu (B) recovered compared to original inoculum. Assays  
828 were performed at an MOI of 1 (A) or MOI of 10 (B). (C) Pigmentation of A909 (1),  $\Delta covR$  (2),  
829 and *pcovR* (3) on THB agar. (D) Percent of viable HVEC subjected to invasion assay with A909  
830 or mutant strains at an MOI of 10. Values are expressed as the percent of cells unstained with  
831 Trypan Blue compared to total cells. Experiments were repeated at least twice with four  
832 replicates and data from a representative experiment is shown. Data was analyzed by unpaired  
833 Student's *t* test. \*\*  $p < 0.01$ , \*\*\*  $p < 0.001$ .

834 **Supplemental Figure 4. Estrous stage impacts normal flora load and both estrous stage and**  
835 **CovR regulation affects GBS vaginal persistence *in vivo*.** (A) Estrous stage of 8 week old CD1  
836 mice was determined by vaginal lavage. Total aerobic normal flora load was calculated by  
837 swabbing the vagina and enumerating recovered bacteria on Tryptic Soy agar similar to as  
838 described in Experimental Procedures. Aerobic flora load was significantly higher at estrus  
839 compared to diestrus ( $p = 0.0074$ ). Lines represent mean cfu recovered. (B) Approximately  
840  $1 \times 10^7$  cfu GBS was inoculated into the vaginal lumen of same CD1 mice as (A). GBS  
841 persistence was measured by swabbing the vagina and enumerating recovered bacteria. Mice  
842 were placed in groups, by staging estrus just prior to inoculation, and sample size was as follows:

843 proestrus (n = 11), estrus (n = 8), metestrus (n = 7), and diestrus (n = 6). (C) Approximately  
844  $1 \times 10^7$  cfu GBS was inoculated into the vaginal lumen of 8 week old CD1 mice as in (B) (n = 12  
845 per group). All *in vivo* experiments were conducted independently at least twice and data from  
846 one representative experiment is shown. Data was analyzed by Kruskal-Wallis test. \*\*  $p < 0.01$ .

847  
848 **Supplemental Figure 5. Neutrophil infiltration into the vaginal lumen requires a functional**  
849 **CXCR2 receptor *in vivo*.** Approximately  $1 \times 10^7$  cfu GBS was inoculated into the vaginal lumen  
850 of 16-17 week old WT BALB/c and CXCR2 KO mice. Vaginal lavage fluid was collected and  
851 wet-mounted unstained onto slides. For all groups, n = 10, or n = 9 for WT BALB/c mice  
852 inoculated with WT GBS. One representative image from each treatment group per given day is  
853 shown. Prior to bacterial inoculation (Day 0) only stratified squamous vaginal epithelial cells  
854 were observed. On subsequent days, free neutrophils were observed in the vaginal lumen (Black  
855 arrows) in WT mice only. Magnification = 100X, scale bar = 100  $\mu\text{m}$ .
