# Supplementary material
Source: PubMed Central journal article supplement (PMC3657335)

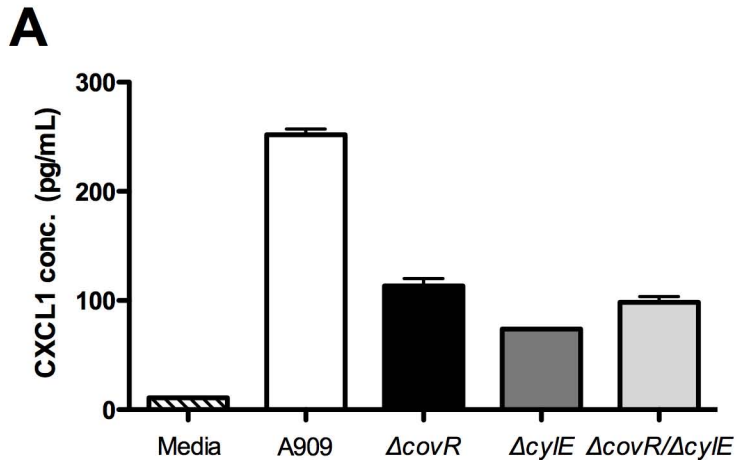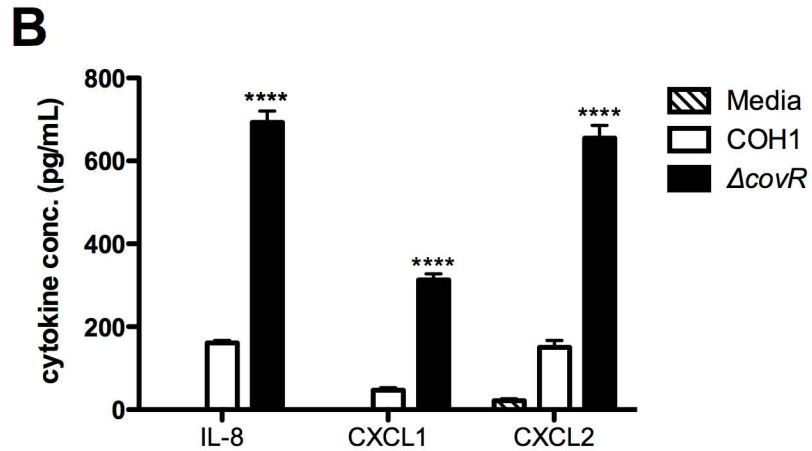

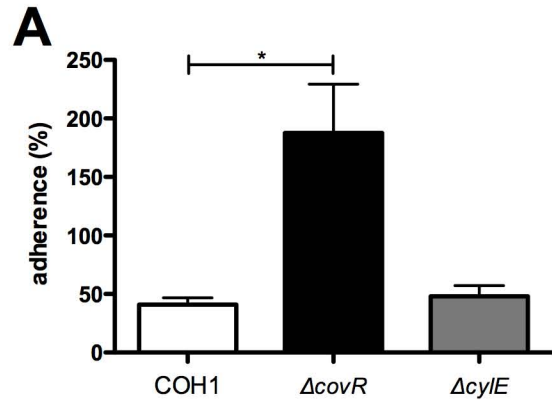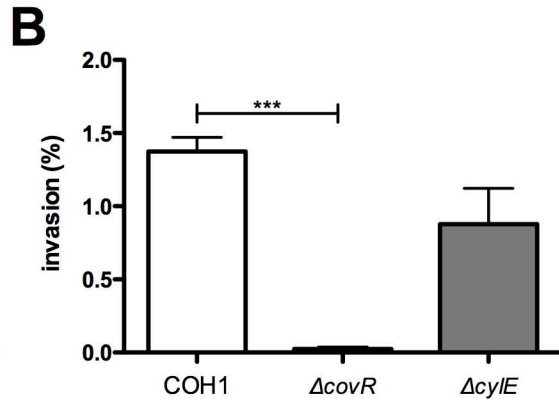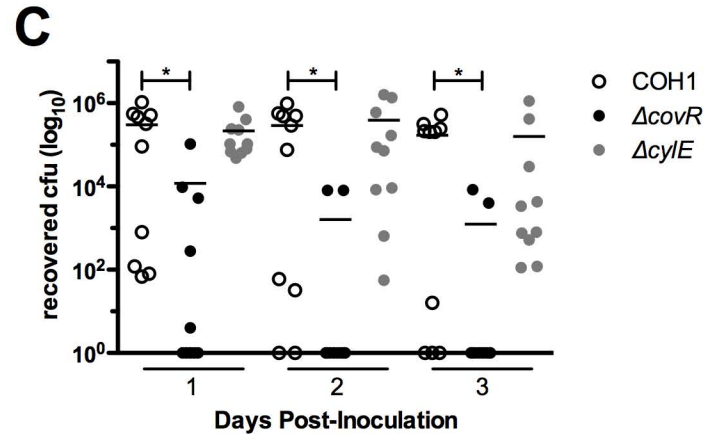

**A**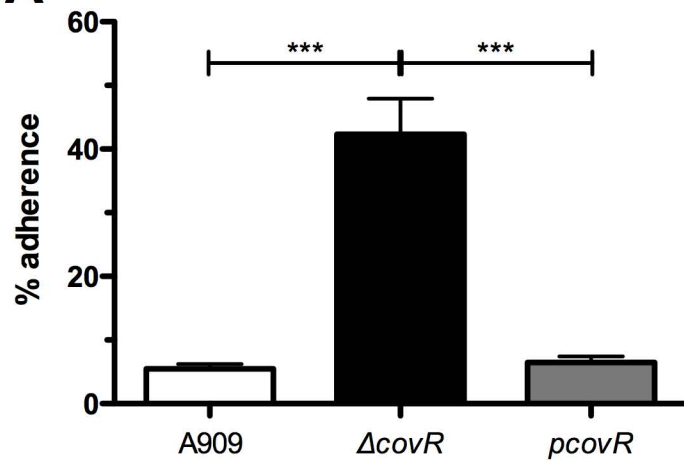**B**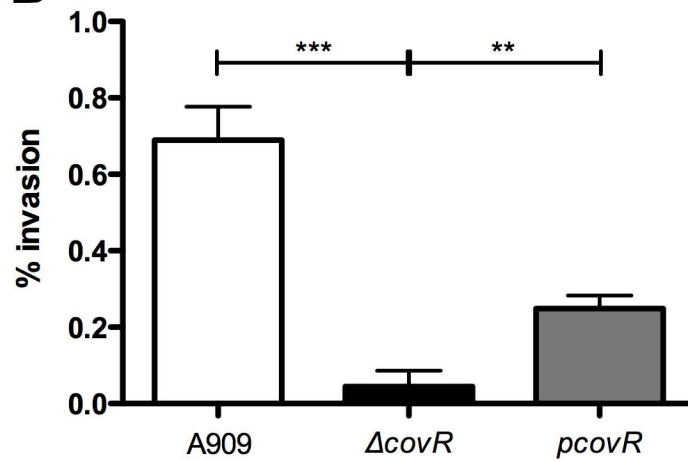**C**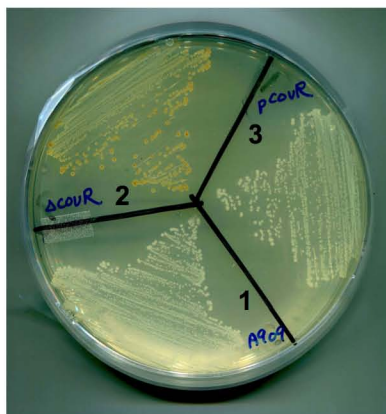**D**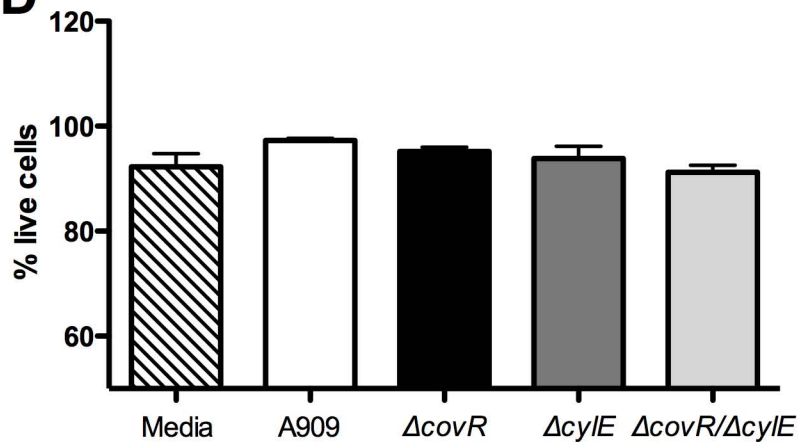

**A**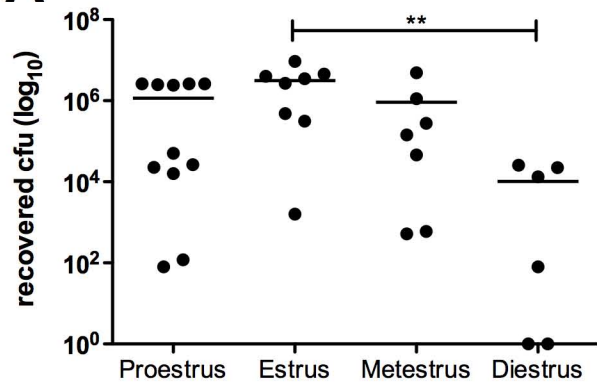**B**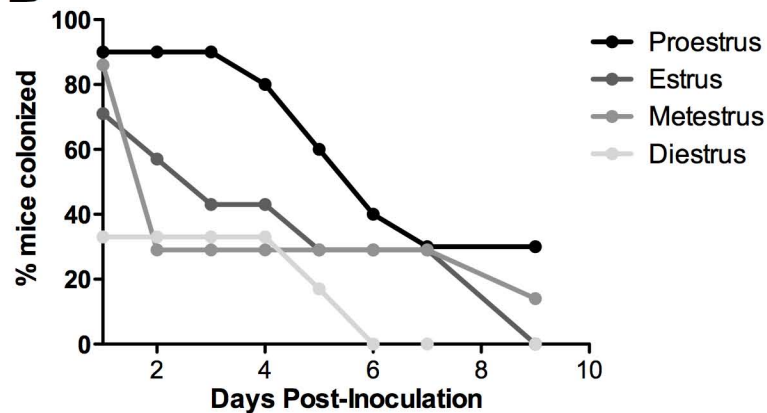**C**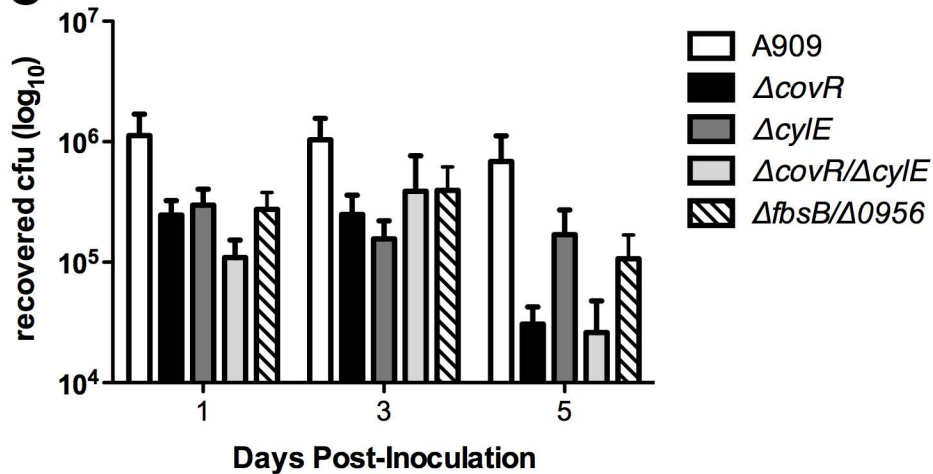

**WT: A909**

**WT:  $\Delta covR$**

**KO: A909**

**KO:  $\Delta covR$**

**Day 0**

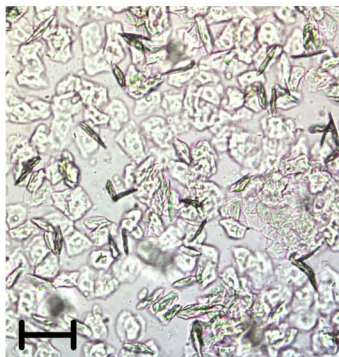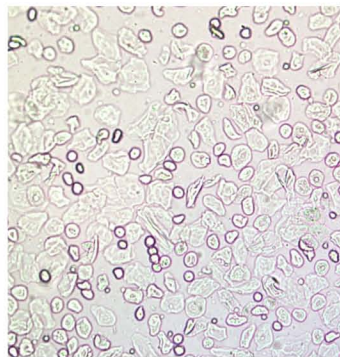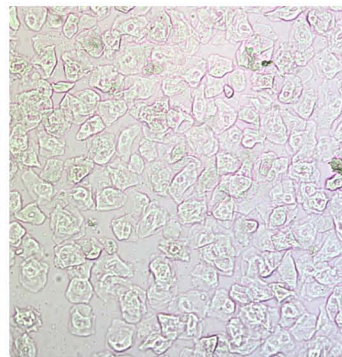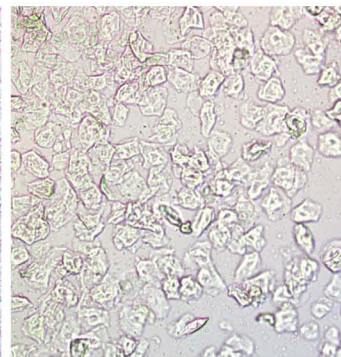

**Day 2**

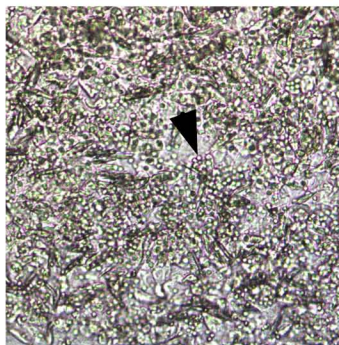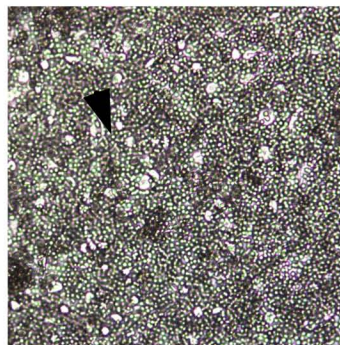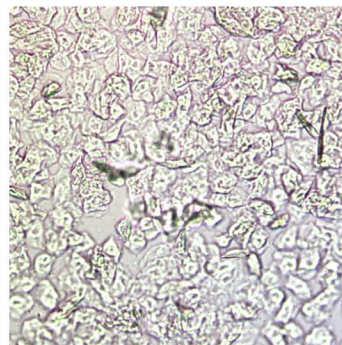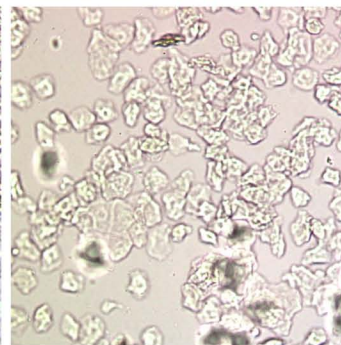

**Day 5**

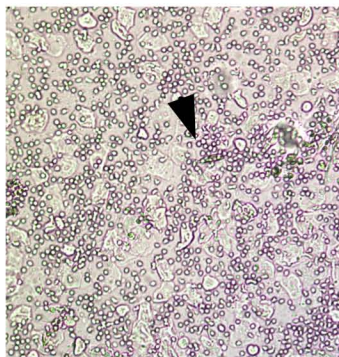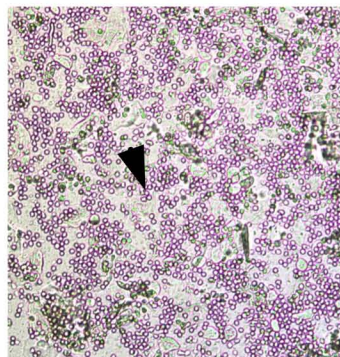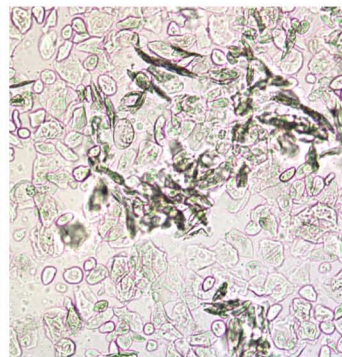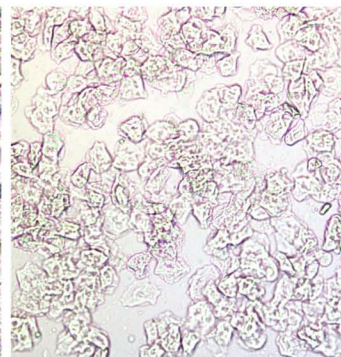

Supplement: NIHMS437084-supplement-Supp_Fig_S1-S5.pdf [file NIHMS437084-supplement-Supp_Fig_S1-S5.pdf]
